# Supplementary material for: OsWRKY5 Promotes Rice Leaf Senescence via Senescence-Associated NAC and Abscisic Acid Biosynthesis Pathway
Source: PubMed Central journal article supplement (PMC6770167; doi:10.3390/ijms20184437), 2019-09-09
Supplement: ijms-20-04437-s001.pdf [file ijms-20-04437-s001.pdf]

## Supplementary information

|          |                                                           | Subgroups <sup>a</sup> | Similarity (%) <sup>b</sup> |
|----------|-----------------------------------------------------------|------------------------|-----------------------------|
| OsWRKY5  | WRKYGQKMAKGNPCPRAYRCTMASGCPVRKQVQRCAEDKSLILITTYEGTSH      |                        |                             |
| AtWRKY18 | WRKYGQKVTRDNPSPRAYFRCSFAPSCPVKKKVQRSAEDPSLILVATYEGTSH     | Ila                    | 35/53 (66)                  |
| AtWRKY40 | WRKYGQKVTRDNPSPRAYFKCACAPSCSVKKKQQRSVEDQSVLIVATYEGEHNH    | Ila                    | 31/53 (58)                  |
| AtWRKY6  | WRKYGQKMAKGNPCPRAYRCTMATGCPVRKQVQRCAEDRSILITTYEGNHNH      | Ilb                    | 48/53 (91)                  |
| AtWRKY47 | WRKYGQKMAKGNPCPRAYRCTMAVGC PVRKQVQRCAEDTTILITTYEGNHNH     | Ilb                    | 46/53 (87)                  |
| AtWRKY8  | WRKYGQKAVKNSPYPRSYRCTTQ-KCNVKKRVERSYQDPTVVITTYESQHNH      | Ilc                    | 29/53 (55)                  |
| AtWRKY49 | WRKYGQKSIKNSPNPRSYRKTNP-ICNAKKQVERSIDESNTYIITTYEGEHNH     | Ilc                    | 27/53 (51)                  |
| AtWRKY7  | WRKYGQKPIKGSFHPRGYYKCSVVRGCEARKHVERALDDAMMLIVTYEGDHNH     | Ild                    | 30/53 (57)                  |
| AtWRKY17 | WRKYGQKPIKGSFHPRGYYKCSVVRGCEARKHVERALDDSTMLIVTYEGEHNH     | Ild                    | 30/53 (57)                  |
| AtWRKY14 | WRKYGQKPIKGSFHPRGYYRCSVSSKGC SARKQVERSRTPDNMLIVTYTSEHNH   | Ile                    | 28/53 (53)                  |
| AtWRKY29 | WRKYGQKPIKGSFHPRSYYRCSVSSKGC LARKQVERNPNQNPKEFTIITYTNEHNH | Ile                    | 26/53 (49)                  |
|          | WRKYGQK C C H H                                           |                        |                             |

**Fig. S1.** Amino acid sequence alignments of WRKY domains between OsWRKY5 and group II AtWRKY proteins.

Amino acid sequences of OsWRKY5 and group II AtWRKY proteins were obtained from the Rice Genome Annotation Project (<http://rice.plantbiology.msu.edu/>) and The Arabidopsis Information Resource (TAIR, <https://www.arabidopsis.org/>), respectively. Sequence alignment was performed using ClustalW with default parameters. Sequences are as follows: OsWRKY5, Os05g04640; AtWRKY18, At4g31800; AtWRKY40, At1g80840; AtWRKY6, At1g62300; AtWRKY47, At4g01720; AtWRKY8, At5g46350; AtWRKY49, At5g43290; AtWRKY7, At4g24240; AtWRKY17, At2g24570; AtWRKY14, At1g30650; AtWRKY29, At4g23550. Black boxes represent amino acids of AtWRKY proteins that are identical to those of OsWRKY5. Red and blue boxes represent the conserved WRKYGQK sequence and zinc finger motif of the WRKY domain, respectively. <sup>a</sup>Eulgem et al. (2000) classified group II AtWRKY proteins into five subgroups [37]. <sup>b</sup>Amino acid similarity of AtWRKY proteins compared with OsWRKY5. Os, *Oryza sativa*; At, *Arabidopsis thaliana*.

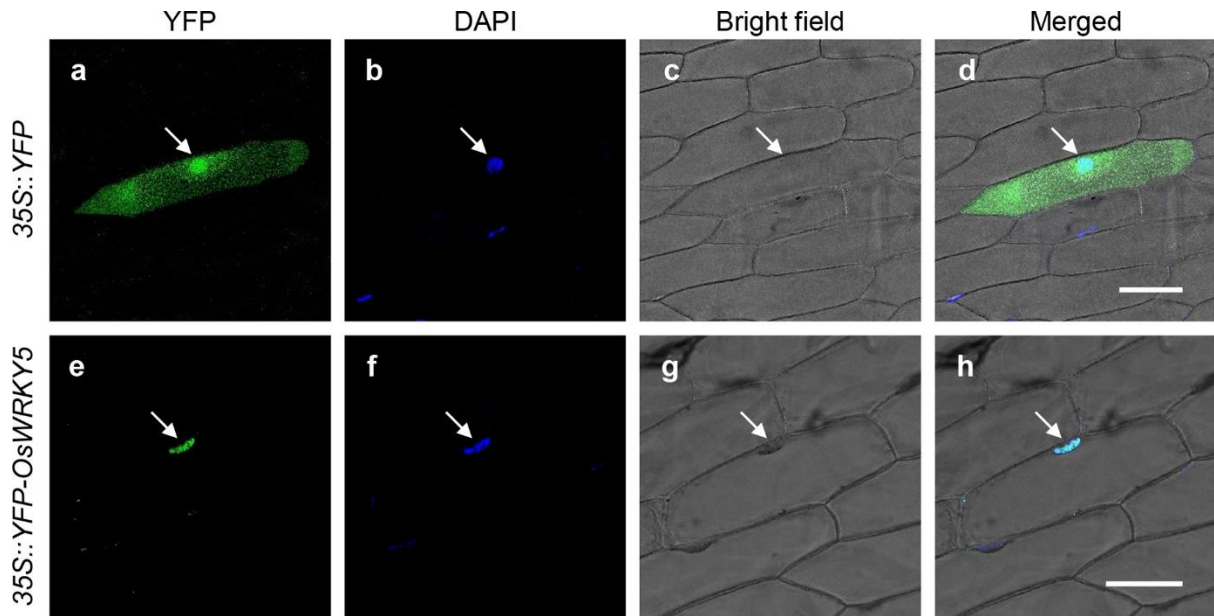

**Fig. S2.** Subcellular localization of OsWRKY5.

YFP-fused OsWRKY5 proteins transiently expressed in onion epidermal cells. Upper panels show fluorescence from the YFP control (**a-d**), which was distributed throughout the cell. Lower panels show the fluorescent signal of YFP-OsWRKY5 exclusively localized to the nucleus (**e-h**). Nuclei were stained with 4',6-diamidino-2-phenylindole dihydrochloride (DAPI). Experiments were repeated twice with similar results. White arrows indicate the position of the nucleus. Bars = 100  $\mu$ m.

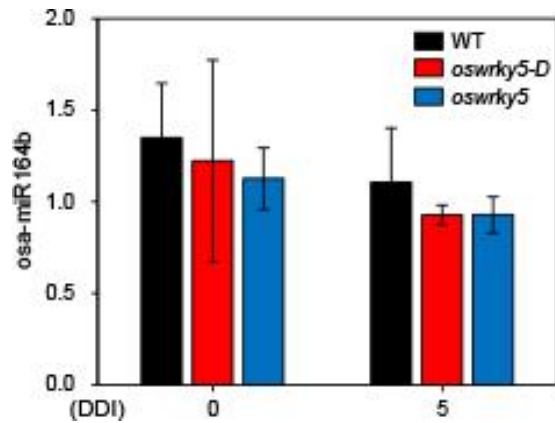

**Fig. S3.** Endogenous *osa-miR164b* levels in *oswrky5-D* and *oswrky5*.

Total RNA was extracted from detached leaves of WT and mutant lines (*oswrky5-D* and *oswrky5*) at 0 and 5 DDI under DIS as shown in Figure 2B. First-strand cDNA was synthesized by stem-loop pulsed RT-PCR. Transcript levels of *osa-miR164b* were determined by RT-qPCR and normalized using that of U6 snRNA. Mean and SD values were obtained from more than three biological replicates. No significant difference was found between WT and mutant lines by Student's *t*-test. DDI, day(s) of dark incubation.

AGAAACAACCTACCCTAGCTGGTTTTTGCACCTCTGAAGTCTAAACTGAAAAGGTCTTCAGTTCTTGATATATATG  
 CAGATATTGTCAACTACTAGCTGATGAAGGCC**TTGACT**CTAGCTAAATACTAAGCCTCATGTGTCAATTTCTTCA  
 TGATTTCTCCACCCATATTGCGGCTGGATAATGTACACTTAGGCATCAGTCCATATGGTGTGTGAATGTGCAAGA  
 ACGGATCCAACACGCTAGGTAGAGTCGTAGAGATATATATAGATCCGGCCGTGAAAATGCCATCAAACCTTTCT  
 CATGAAACTACGCTTATGAAGAAAGAGAGTTTACCACATGTTTATCTTTTTGAATTCATGCATATTGATTTGAT  
 TGGCTACAAGTGCATGCGCATTAAATCCGCAAGTGGTTGACACTGGTTTATTACTTTCTTTACATAGCAAAAAA  
 AAAATAATGAAACTATGGTTGTGTTTAGTTCCCTTAAGCTTCCAAAAATCCGTCACATCAAATGTTTGGATAC  
 ATGCATAGAGCATTAAATGTGGACGAAAAAACCAATTACACAGTTTGCATGTAAATTACGAGACGAATCTTTT  
 GAGCCTAATTACGCCGTGATTTGACAATGTGGTGCTACAGTAAACATTTGCTAATGGCAAATTAATTAGACTTA  
 ATAAATTCGTCTCACAGTTTACAGGCGGAATCTGTAATTTGTTTATTATTAGTATATATTTAATACTTCAAATGTG  
 TGCCGTATTCTTCAAAAAAATTTGGAGGAGGAACTAAACACAGCCTATATTTAAAAAATGATTTTGAAG  
 ATAAATCTAATCAATATGATTAATTCTGTGTAATTAATGATATCA**AGTCAA**GTAAGAGAGATGATTAGAAGA  
 AGCGAATATTAGGGAAGAACCTAATATCAGATAATTAGAAGAAGCGAGACTTTAAACTTAGATCATCTAGCAC  
 ACAACTTTATAGATGCTAGCCGAAAAAATCATGGACGTTTGAGAGAGAGAGAGATCGTACTGAATGGAGTTAA  
 TTGTTTGCTGCAGAGCGTGGCAGATCCTCTCATGCACGCACCATCACTCCTAGGCTATAGCTTATCTCGATCGAT  
 CAACTTGGTGATCGAAAGGGAGTCTACATCGCG**TTGACT**CCG**TTGACC**CGGCCCATGCAGTA**CACGTG**GAC  
 GCGAGTGCCTCATCCACCTGTCACGCTGACGTACGCCCGCTGACATGGCTGGCCCACCATCCCCATCGATT  
 CCGATCCCCATTCTCTTGATAATTTGGTCCAAGTCCAAGTCTTCCGTTTACGTTACATATGCTAGCTTCTCGT  
 CGTTAGCTAGCTATAGGTTAAACTACTTTACTAATTTCTCACTCTCTCTCTCTCTCTCTTGGAACCTAGCTAACT  
 AGCTAGGAGTAGTAGTAGGAGCAAGAGCCATATAAAGCTAGCTAGCTACGACCTAGCTAGCTCTCCCCTACTT  
 TAATTGATTTCTCTCCTTCTCACTCTACTGATCGATCGATCGAGCTCTATCC**ATG**GAGATG

**Fig. S4.** The *Cis*-elements in *OsWRKY5* promoter region.

The *cis*-elements were identified in the 1,500-bp upstream of the transcription initiation site (+1) represented by bent arrow. Red, blue, and black shaded sequences represent the W-boxes, G-box, and start codon, respectively.

**Table S1.** Primers used in this study.

| A. Primers for verification of T-DNA insertion |                                                        |                                |
|------------------------------------------------|--------------------------------------------------------|--------------------------------|
| Primer names                                   | Left primers (5' → 3')                                 | Right primers (5' → 3')        |
| PFG_3A-15928                                   | CATTAAAGCTGGACCAGATGG                                  | AACCACTTGC GGATTAATGC          |
| PFG_3A-06060                                   | TTGGATGCCTGATTAAGGTTG                                  | CCGTTCTTGCACATTCACAC           |
| pGA2715                                        | CTAGAGTCGAGAATTCAGTACA                                 | TTGGGGTTTCTACAGGACGTAAC        |
| B. Primers for subcellular localization        |                                                        |                                |
| Gene                                           | Forward primers (5' → 3')                              | Reverse primers (5' → 3')      |
| <i>OsWRKY5</i>                                 | ATGGAGATGATGGTGCAGAAGC<br>A                            | TCAGGTGGGAGACGTGCCGCAA         |
| C. Primers for RT-qPCR                         |                                                        |                                |
| Genes                                          | Forward primers (5' → 3')                              | Reverse primers (5' → 3')      |
| <i>OsWRKY5</i>                                 | GGCTCCAATGATCAGTGATGGA                                 | AGCCATTGTGCATCGGTAGT           |
| <i>SGR</i>                                     | AGGGGTGGTACAACAAGCTG                                   | GTCCTTGC GGAAAGATGTAG          |
| <i>NYC3</i>                                    | TGTCGTTGCCATGTGAAGAT                                   | TTGGTCACGCCACAAATCTA           |
| <i>OsPAO</i>                                   | GGAAATCCTAGCCAAGAAGTGTT<br>G                           | CGCAGGAATCCCAGCAGTT            |
| <i>Osh69</i>                                   | CCACAACACGGATAACTT                                     | GGTGAACACTATGGAACA             |
| <i>Osh36</i>                                   | GCACGGAGGCGAACGA                                       | TTGAGCGGTAGCACCCATT            |
| <i>OsI85</i>                                   | GAGCAACGGCGTGGAGA                                      | GCGGCGGTAGAGGAGATG             |
| <i>OsNAP</i>                                   | CAAGAAGCCGAACGGTTC                                     | GTTAGAGTGGAGCAGCAT             |
| <i>OsNAC2</i>                                  | CAACTCCTGGAGAGCTGCAA                                   | GATCTCCGGGTTACGTCG             |
| <i>OsNCED3</i>                                 | GTGGTGCTCGACAAGGAGAA                                   | CAGAGGTGGAAGCAGAAGCA           |
| <i>OsNCED4</i>                                 | GAGGTACGACTTCCATGGGC                                   | TTGAGGTACGGCTTGGACAC           |
| <i>OsNCED5</i>                                 | CCCAGCTTGAAGCTTTTGCT                                   | ACAACACTGCAACTATCCCTATCAC<br>T |
| <i>OsUBQ5</i>                                  | ACCACTTCGACCGCCACTACT                                  | ACGCCTAAGCCTGCTGGTT            |
| D. Primers for pulsed RT-qPCR of miR164b       |                                                        |                                |
| Primer names                                   | Forward primers (5' → 3')                              | Reverse primers (5' → 3')      |
| miR164b_pulsed RT                              | GTCGTATCCAGTGCAGGGTCCGAGGTATTTCGACTGGATACGACTGCAC<br>G |                                |
| miR164b_qPCR                                   | GCTCTGGAGAAGCAGGGC                                     | GTGCAGGGTCCGAGGT               |

U6 snRNA\_qPCR CAACGGATATCTCGGCTCT CAACTTGC GTTCAAAGACTC

E. Primers for yeast one-hybrid assay

| Primer names           | Forward primers (5' → 3') <sup>a</sup> | Reverse primers (5' → 3') <sup>a</sup> |
|------------------------|----------------------------------------|----------------------------------------|
| OsWRKY5_GAD42          | <u>GAATTC</u> ATGGAGATGATGGTGCA        | <u>CTGCAGT</u> CAGGTGGGAGACGTGCC       |
| 4_EcoRI and PstI       | GAAGCAACGA                             | GCAA                                   |
| OsNAP-1_EcoRI and XbaI | <u>GAATTC</u> AGGTGTGAAAACAAAT<br>AAGA | <u>CTCGAGA</u> ATAGTACCGCTGTGGTG<br>AA |
| OsNAP-2_EcoRI and XbaI | <u>GAATTC</u> ATCACGTCGTTTTTCAAC<br>TA | <u>CTCGAGG</u> TACCAAGGTGCTAAGAT<br>AC |
| OsNAC2-1_SalI and XhoI | <u>GTCGACT</u> GTGTTCAGTTTGTCTCT<br>TC | <u>CTCGAGG</u> TTAACAAGCCAGAACA<br>AAC |
| OsNAC2-2_SalI and XhoI | <u>GTCGACC</u> GGGACATTTTCAGACG<br>TTT | <u>CTCGAGT</u> GGTTTTGTGGGGCTTAG<br>AA |
| OsNAC2-3_SalI and XhoI | <u>GTCGACC</u> CACTGCTATTACACAA<br>TAG | <u>CTCGAGAT</u> CTCCCAGGAGATAAGC<br>CA |
| OsNAC2-4_SalI and XhoI | <u>GTCGACTT</u> CTCGTTGCTGCTCG<br>GCT- | <u>CTCGAGG</u> GCTAGTGATCCATCAGA<br>TC |
| OsNAC2-5_SalI and XhoI | <u>GTCGAC</u> CTAGCTAGTACTCCATC<br>CGT | <u>CTCGAGC</u> AGGTTACTACTCCCTCC<br>AT |

<sup>a</sup> The underlined nucleotides represent the restriction site for restriction enzymes.
